1 **Title:**

2 Migration alters oscillatory dynamics and promotes survival in connected bacterial populations

3

4 **Authors:**

5 Shreyas Gokhale<sup>†,1</sup>, Arolyn Conwill<sup>†,1</sup>, Tanvi Ranjan<sup>2</sup> and Jeff Gore<sup>1,\*</sup>

6 <sup>1</sup> Physics of Living Systems, Department of Physics, Massachusetts Institute of Technology,  
7 Cambridge, MA 02139.

8 <sup>2</sup> John A. Paulson School of Engineering and Applied Sciences, Harvard University, Cambridge,  
9 MA 02138.

10 \* To whom correspondence should be addressed. Email: [gore@mit.edu](mailto:gore@mit.edu)

11 † These authors contributed equally to this work.

12

13 **Abstract:**

14 Migration influences population dynamics on networks, thereby playing a vital role in scenarios  
15 ranging from species extinction to epidemic propagation. While low migration rates prevent local  
16 populations from becoming extinct, high migration rates enhance the risk of global extinction by  
17 synchronizing the dynamics of connected populations. Here, we investigate this trade-off using  
18 two mutualistic strains of *E. coli* that exhibit population oscillations when co-cultured. In  
19 experiments, as well as in simulations using a mechanistic model, we observe that high migration  
20 rates lead to in-phase synchronization whereas intermediate migration rates perturb the oscillations  
21 and change their period. Further, our simulations predict, and experiments show, that connected  
22 populations subjected to more challenging antibiotic concentrations have the highest probability  
23 of survival at intermediate migration rates. Finally, we identify altered population dynamics, rather  
24 than recolonization, as the primary cause of extended survival.

25

26

27

28

29

30

31 **Main Text:**

32

33 Spatially extended populations can be distributed heterogeneously, often in the form of a network  
34 of relatively dense population patches connected to each other by migration (1, 2). In  
35 macroecology, population networks are pervasive in a variety of social and ecological settings  
36 such as human settlements connected by transportation routes (3), oceanic islands connected by  
37 migration (4), and faraway plant populations connected by seed dispersal (5, 6). Migration patterns  
38 shape the population dynamics on these networks (7–9) and can have a profound impact on  
39 population stability and persistence (5, 10, 11).

40

41 One major focus of both theoretical work and field studies on connected populations has been  
42 conservation ecology, particularly in the context of endangered species (12). In general,  
43 disconnected networks or fragmented habitats are considered undesirable because isolated  
44 populations are susceptible to extinction due to demographic stochasticity or environmental  
45 fluctuations (13). In the presence of migration, individuals from neighboring populations can  
46 stabilize an endangered population (14). In addition, migration can counteract stochastic extinction  
47 of a local population by creating a metacommunity with a larger total population size (10).  
48 Furthermore, migrants can repopulate nearby patches that have gone extinct (13, 15). The concept  
49 that migration can prevent permanent population collapse has led to the construction of  
50 ‘conservation corridors’ that are intended to prevent local extinctions by facilitating movement  
51 between previously unconnected habitat patches (16).

52

53 However, excessive migration can lead to in-phase synchronization of population dynamics in  
54 connected habitat patches (12, 17–21). In harsh environmental conditions, synchronization can  
55 enhance the risk of global stochastic extinction during periods of collective decrease in population  
56 size (12), since patches effectively merge into one large population in the limit of strong coupling  
57 (22). Accordingly, a number of computational models predict that intermediate migration rates  
58 optimize species persistence time and extend metapopulation extinction time, mainly due to  
59 recolonization events following local extinction (23–26). Such recolonization-mediated  
60 enhancement in survival has been observed experimentally in metapopulations of plants (5), plants  
61 and predatory mites (27), fruit flies (10), and ciliate predator-prey systems (15, 28).

62

63 Apart from enabling recolonization, migration can also perturb population dynamics, potentially  
64 giving rise to another mechanism of enhanced survival. Populations exhibiting deterministic  
65 oscillations are ideally suited to studying migration-induced perturbations in population dynamics.  
66 In particular, time course data enables both quantification of perturbations and identification of  
67 extinction and recolonization events, making it possible to ascertain the relative importance of  
68 each of these survival mechanisms. While theoretical work on nonlinear maps (29) and on  
69 predator-prey systems (30) has linked perturbed within-patch population dynamics to enhanced  
70 survival, experimental validation is lacking owing largely to difficulties in obtaining high-quality  
71 time series data.

72

73 Here, we develop a bacterial model system composed of two connected oscillating populations to  
74 elucidate the impact of migration on population dynamics (Fig. 1A). Our approach is similar to  
75 previous studies (31–37) that have employed simple microbial populations in a laboratory setting  
76 to test ecological theories. Although it forgoes the complexity of natural population networks, our  
77 system is ideal for systematically exploring the relationship between survival and perturbed  
78 population dynamics because it allows us to precisely control the migration rate as well as  
79 environmental conditions. We also use a mathematical model of antibiotic degradation by bacteria  
80 to better understand the effects of migration between patches on our experimental system.

81

82 In this work, we first quantify the onset of in-phase synchronization in benign environmental  
83 conditions, in which individual populations exhibit stable oscillations over the duration of the  
84 experiment (Fig. 1B). More importantly, we show that en route to synchronization, the system  
85 goes through a series of qualitatively distinct oscillatory dynamics that are not observed in the  
86 absence of migration. We further show that these new dynamics enable populations to endure  
87 longer in harsh environments, as evidenced by the increase in survival times for moderate levels  
88 of migration. We emphasize that intermediate migration rates can lead to different ecological  
89 outcomes, even though the migration rate is below the level necessary for the onset of  
90 synchronization (Fig. 1B). In a broader context, our results on two connected bacterial populations  
91 can be viewed as the first step in a bottom up approach aimed at probing the role of migration in  
92 the population dynamics of more complex networks.

93

94 **Results:**

95 In order to quantify effects such as synchronization in an experimental model system, we use a  
96 bacterial cross-protection mutualism that exhibits robust oscillatory population dynamics (31). The  
97 system is comprised of two strains of *Escherichia coli* that protect each other from antibiotics in  
98 the environment by producing resistance enzymes. One strain (AmpR) is resistant to the antibiotic  
99 ampicillin, and the other strain (ChlR) is resistant to the antibiotic chloramphenicol (Fig. 2A).  
100 Previous work has already demonstrated that a co-culture of AmpR and ChlR exhibits robust limit  
101 cycle oscillations as a function of time over a broad range of antibiotic concentrations, when  
102 subjected to serial daily dilutions into fresh media and antibiotics (31).

103

104 In the serial daily dilution scheme employed in our experiments (Fig. 2B), we propagated co-  
105 cultures of the AmpR and ChlR strains in ~24 hour growth-dilution cycles in 96-well plates under  
106 well-mixed conditions in the presence of LB media, ampicillin, and chloramphenicol. At the end  
107 of each growth cycle, we measured the total population density using spectrophotometry and the  
108 relative proportion of AmpR and ChlR cells using flow cytometry (see Materials and Methods).  
109 Next, we diluted the co-cultures by a factor of 100 into fresh media containing antibiotics and  
110 subjected them to another growth cycle for ~24 hours. Upon repeating these daily growth-dilution  
111 cycles for 15 days, we observed that the population density of AmpR (purple) as well as ChlR  
112 (green) cells oscillates with a period of 3 days (Fig. 2C, left panel). We note that the ratio of AmpR  
113 cells to ChlR cells constitutes an appropriate characterization of the state of the population because  
114 it also exhibits period-3 oscillations, with the oscillation amplitude spanning four orders of  
115 magnitude (Fig. 2C, right panel).

116

117 In order to examine the effects of migration, we studied pairs of co-cultures and coupled them via  
118 transfer of cells between the two patches of each pair. Fig. 3A depicts the growth-migration-  
119 dilution scheme employed in our experiments. The scheme is similar to the growth-dilution  
120 scheme discussed earlier (Fig. 2B), with two important additions. First, we consider two co-  
121 cultures instead of one, which we label as ‘habitat patches’ A and B. The second crucial addition  
122 is the migration step, which occurs after growing the co-cultures for 24 hours and measuring the  
123 total population density and relative abundances of the strains, but before dilution into fresh media.

124 In this step, we transfer a fraction  $m$  of the cells from each co-culture into the other (corresponding  
125 to a fixed volume). The mixed co-cultures are then diluted into fresh media with antibiotics and  
126 grown again for 24 hours, as done previously for individual co-cultures. This migration scheme  
127 allows us to vary the migration rate over several orders of magnitude, enabling us to experimentally  
128 probe the effect of migration on population dynamics, in a systematic manner.

129

130 Since migration is known to lead to in-phase synchronization in a variety of systems (12, 18–21),  
131 we first quantified the minimum migration rate necessary for the onset of synchronization under  
132 benign environmental conditions (10  $\mu\text{g/ml}$  ampicillin, 8  $\mu\text{g/ml}$  chloramphenicol), in which the  
133 system exhibits stable oscillations (Fig. 2C). For each migration rate, we performed daily growth-  
134 migration-dilution experiments with three initial relative abundances of AmpR to ChlR cells for  
135 each of two biological replicates, i.e. a total of six replicate pairs of co-cultures. While in-phase  
136 synchronization can sometimes be observed even at very low migration rates (and even at  $m = 0$   
137 when the two populations happen to oscillate in phase without coupling), all replicates showed in-  
138 phase synchronization for  $m \geq 0.2$  (Fig. 3B). This strongly suggests that the onset of complete in-  
139 phase synchronization lies in the region  $0.1 < m \leq 0.2$ .

140

141 While synchronization is certainly an important effect, it is not clear whether it is the only effect  
142 that migration has on population dynamics. In particular, it is worth investigating whether there  
143 are additional qualitative differences in population oscillations at intermediate migration rates. To  
144 this end, we took a closer look at the population time series data as a function of increasing  
145 migration rate. It is evident that our coupled co-cultures exhibit period 3 oscillations in the absence  
146 of migration ( $m = 0$ , Fig. 3C) as well as very high migration rates ( $m = 0.2$ , Fig. 3E), the  
147 difference being that the oscillations are unsynchronized in the former case and in-phase  
148 synchronized in the latter. However, the period-3 oscillations are perturbed at intermediate  
149 migration rates, and we see signatures of other periods, such as period-4 oscillations at  $m = 0.1$   
150 (Fig. 3D). The perturbed oscillations may also reflect the presence of long transients (38).  
151 Interestingly, perturbed oscillations appear to be quite common for  $m = 0.04$  and  $m = 0.1$  but are  
152 not observed at very low or very high migration rates (Fig. S1).

153

154 The data in Fig. 3C-E demonstrate that migration not only synchronizes population dynamics but  
155 also alters them in a qualitative manner. To better understand the sequence of experimental  
156 outcomes with increasing migration rate, we turned to an ordinary differential equation based  
157 mechanistic model that simulates antibiotic degradation and cell growth. This model was  
158 developed in the context of isolated co-cultures and has been shown to reproduce the observed  
159 period-3 limit cycle oscillations over a reasonably broad parameter regime (31). The model has  
160 two variables  $N_1$  and  $N_2$  corresponding to the population densities of AmpR and ChlR,  
161 respectively, and two variables  $A_1$  and  $A_2$  corresponding to the concentrations of the antibiotics  
162 ampicillin and chloramphenicol, respectively. Over the 24 hour growth period, the population  
163 densities and antibiotic concentrations change with time according to the following equations:

164

$$165 \quad \frac{dN_1}{dt} = \gamma_1(A_2)N_1 \left(1 - \frac{N_1 + N_2}{K}\right)$$

$$166 \quad \frac{dN_2}{dt} = \gamma_2(A_1)N_2 \left(1 - \frac{N_1 + N_2}{K}\right)$$

$$167 \quad \frac{dA_1}{dt} = \frac{-V_{max}A_1}{K_m + A_1} N_1(t = 0)$$

$$168 \quad \frac{dA_2}{dt} = -c_2A_2N_2$$

169

170 Here, we assume that bacterial growth is logistic, with antibiotic concentration-dependent growth  
171 rates  $\gamma_1(A_2)$  and  $\gamma_2(A_1)$ . The two strains exhibit neutral resource competition, as reflected in the  
172 combined carrying capacity  $K$ . Ampicillin degradation is assumed to obey Michaelis-Menten  
173 kinetics. In reality, ampicillin is degraded by  $\beta$ -lactamase (39, 40) molecules produced by AmpR  
174 cells during their growth as well as the free ones carried over from the previous day. Our model  
175 assumes that the dominant contribution comes from the  $\beta$ -lactamases carried over from the  
176 previous day. Since the number of enzyme molecules carried over is proportional to the number  
177 of AmpR cells present at the beginning of the day, the equation for  $A_1$  contains the initial density  
178 of AmpR cells  $N_1(t = 0)$  rather than their instantaneous density  $N_1(t)$ . Since chloramphenicol  
179 degradation is intracellular (39), the degradation rate of chloramphenicol is taken to be  
180 proportional to the density of ChlR cells. Finally, since AmpR cells are sensitive to  
181 chloramphenicol, and ChlR cells are sensitive to ampicillin, the growth rates of the two strains are

182 proportional to the concentration of the antibiotic to which they are sensitive. These growth rates  
183 are given by:

184

$$185 \quad \gamma_1(A_2) = \begin{cases} 0 & t < t_{lag} \\ \frac{\gamma_1^R}{1 + A_2/I_{12}} & t \geq t_{lag} \end{cases}$$

186

$$187 \quad \gamma_2(A_1) = \begin{cases} 0 & t < t_{lag} \\ -\gamma_2^D + \frac{\gamma_2^R + \gamma_2^D}{1 + A_1/I_{21}} & t \geq t_{lag} \end{cases}$$

188

189 Here, we have also incorporated a lag phase, characterized by a time scale  $t_{lag}$  over which the  
190 cells do not grow or die. Since chloramphenicol is a bacteriostatic antibiotic, i.e. it inhibits sensitive  
191 cell growth but does not cause the cells to die, the growth rate of AmpR cells approaches zero at  
192 high concentrations of chloramphenicol but never becomes negative (Fig. 4A, green curve). On  
193 the other hand, since ampicillin is a bactericidal antibiotic, i.e. its presence can cause sensitive  
194 cells to die, the growth rate of ChIR cells becomes negative at high concentrations of ampicillin  
195 (Fig. 4A, purple curve). Numerical values and descriptions of all parameters used in the  
196 simulations are listed in Table S1. In a typical simulation over a 24 hour growth cycle, the cell  
197 densities saturate (Fig. 4B, top panel) and the antibiotics are inactivated (Fig. 4B, bottom panel).  
198 We note that the initial and final densities of AmpR and ChIR can be substantially different, such  
199 that the ratio  $N_1/N_2$  can vary substantially from day to day.

200

201 To gain insight into the experimentally observed changes in oscillatory dynamics with increasing  
202 migration rate, we implemented the growth-migration-dilution scheme in our simulations. The  
203 chief advantage of simulations is that they allow us to analyze the system's behavior over  
204 timescales that are much longer than those accessible in our experiments. The long timescales  
205 enable us to discern whether a given dynamical outcome corresponds to stable oscillations or  
206 transient dynamics. Simulations also facilitate a detailed characterization of oscillatory dynamics  
207 as well as the range of migration rates over which they are observed. In our simulations, we started  
208 with two patches A and B for which we numerically integrated the model equations over 24 hours.  
209 To implement the migration and dilution steps, we mimicked the experimental protocol by



210 resetting the initial population densities and antibiotic concentrations in the two patches for the  
211 next day of growth in accordance with the dilution factor of 100 and the migration rate  $m$ . The  
212 system's dynamical outcomes are best summarized in the form of a bifurcation diagram as a  
213 function of the migration rate (Fig. 4C). In this bifurcation diagram we have plotted the unique  
214 values attained by the population, i.e. the ratio of AmpR to ChlR cells in patch A over the last 50  
215 days of a simulation consisting of 1000 daily dilution cycles.

216  
217 As expected, we observe a regime of period-3 oscillations at very low migration rates (Fig. 4C,  
218 blue region) as well as high migration rates (Fig. 4C, red region). Moreover, these oscillations are  
219 unsynchronized at very low migration rates and synchronized in-phase at high migration rates (Fig.  
220 4C, insets corresponding to blue and red regions; also see Fig. S2 for the probability of in-phase  
221 synchronization as a function of the migration rate). Quite remarkably, the bifurcation diagram  
222 also contains a regime of period-4 limit cycle oscillations (Fig. 4C, orange region and inset) at  
223 intermediate migration rates that is surrounded on both sides by narrow regions characterized by  
224 irregular dynamics and long transients (Fig. 4C, green regions). The dynamics in these regions are  
225 strikingly similar to the perturbed oscillations observed in our experiments (Fig. 3D and Fig. S1).  
226 Indeed, our simple model successfully captures the sequence of experimentally observed  
227 dynamical outcomes as a function of the migration rate. In particular, transitions between different  
228 dynamical regimes are in reasonable qualitative agreement with our experiments. Moreover, the  
229 presence of altered population dynamics in both experiments and simulations suggests that  
230 intermediate migration rates can indeed give rise to population dynamics that are distinct from  
231 those in the uncoupled and synchronized regimes.

232  
233 It is plausible that the disturbance of oscillations at intermediate migration rates may influence a  
234 population's viability in harsh environments, although it is not *a priori* obvious whether this  
235 influence would be harmful or beneficial. As mentioned earlier, it has been suggested that  
236 synchronization can enhance the risk of global extinction in harsh environments (12, 18), which  
237 implies that high migration rates may have a deleterious impact on the probability of survival, but  
238 it is not clear if this effect is monotonic. To explore the effect of intermediate migration rates on  
239 survival probability, we simulated our model in harsh environmental conditions. For these  
240 simulations, a harsh environment corresponds to higher antibiotic concentrations (10  $\mu\text{g/ml}$ )



241 ampicillin, 16  $\mu\text{g}/\text{ml}$  chloramphenicol), where the model predicts that isolated populations go  
242 extinct deterministically in the absence of migration. Furthermore, we introduce 15% noise in the  
243 migration and dilution steps of our simulations, to mimic the stochastic fluctuations resulting from  
244 our experimental protocol. To quantify the impact of migration on survival, we generated  
245 probability distributions  $P(\tau)$  of population lifetimes, i.e. the durations  $\tau$  for which the populations  
246 survived for various  $m$  (Fig. 5A). The distributions decay exponentially over a timescale that  
247 increases with migration rate for  $m \lesssim 0.03$  and decrease with migration rate for  $m \gtrsim 0.1$ .  
248 Interestingly, within a narrow intermediate migration regime ( $0.04 \lesssim m \lesssim 0.07$ ), the survival  
249 time distributions have longer tails, which suggests that intermediate migration rates can result in  
250 enhanced survival as compared with isolated populations or strongly coupled ones. Overall, the  
251 variation of  $P(\tau)$  with  $m$  indicates that moderate levels of migration offer the best chance of  
252 survival in harsh conditions.

253

254 A more experimentally tractable measure of the effect of migration on survival in challenging  
255 environments is the fraction of populations that survive over a given period of time. Towards this  
256 end, we computed the probability of survival over 10 days. As expected from the variation in  $P(\tau)$   
257 with  $m$  (Fig. 5A), the survival probability over 10 days changes non-monotonically with the  
258 migration rate (Fig. 5B). This qualitative trend occurs regardless of the duration over which we  
259 compute survival probability (Fig. S3). Moreover, the peak in survival probability occurs in the  
260 regime where we observe approximately exponential decay in  $P(\tau)$ , once again suggesting that  
261 moderate levels of migration perturb population dynamics in a manner that favors extended  
262 survival.

263

264 Motivated by the simulation results, we proceeded to test whether the predicted non-monotonicity  
265 of survival probability with  $m$  is also observed in experiments. Accordingly, we performed  
266 growth-dilution-migration experiments with higher antibiotic concentrations (10  $\mu\text{g}/\text{ml}$  ampicillin,  
267 16  $\mu\text{g}/\text{ml}$  chloramphenicol) and measured the fraction of populations that survived over 10 days.  
268 As predicted by the simulations, the survival probability indeed shows a peak at intermediate  
269 migration rates (Fig. 5C; see Fig. S4 for population density time series). Further, the location of  
270 the maximum shows reasonably good quantitative agreement with the simulations. Collectively,

271 these findings establish that moderate levels of migration promote population dynamics that  
272 extended survival in harsh environments.

273

## 274 **Discussion:**

275 Here, we have shown that two oscillating bacterial populations can synchronize when coupled  
276 sufficiently strongly via migration. Furthermore, we have demonstrated that it is possible for the  
277 migration rate itself to determine the period of oscillation. In particular, our experimental system  
278 exhibits limit cycle period-3 oscillations in the absence of migration. However, we observed  
279 disturbances in these dynamics in the presence of migration that were consistent with the period-  
280 4 oscillations predicted by the model at intermediate migration rates (Fig. 3D). This finding  
281 represents empirical evidence that the characteristics of population oscillations observed in natural  
282 microbial communities may not simply be a result of intrinsic inter- or intra-species interactions,  
283 but may also be a consequence of spatial structure and migration.

284

285 Since migration can perturb population dynamics, it also has the potential to influence the survival  
286 of a population in a challenging environment. For instance, we found that populations were most  
287 likely to survive the duration of the experiment at intermediate migration rates (Fig. 5). The  
288 presence of a maximum in survival probability at intermediate migration rates is potentially  
289 relevant in conservation biology and epidemiology in that controlling migration might lead to  
290 desired outcomes like population stability or disease eradication. Interestingly, the dynamics we  
291 observe within this intermediate migration rate regime resemble noisy out-of-phase period-2  
292 oscillations (see Fig. S5 for bifurcation diagrams and a representative time series), and we see  
293 signatures of such oscillations in some of our surviving experimental populations as well (Fig. S6).  
294 Intuitively, out-of-phase synchronization could ensure that the populations in the two patches do  
295 not simultaneously become low, which averts the danger of global extinction. In previous  
296 computational studies (23, 29, 41, 42), such out-of-phase synchronization has been widely  
297 recognized as a potential mechanism for survival and our experiments provide direct evidence in  
298 support of these numerical findings.

299

300 In field ecology and metapopulation theory, re-colonization of habitat patches after local extinction  
301 events is thought to be a major contributor to extended survival in harsh environments (13), a claim

302 supported by recent experiments on protists (15). However, we observed relatively few instances  
303 of such re-colonization (Fig. S7), implying that re-colonization is not the major cause of extended  
304 survival in our system. Nevertheless, in a more spatially extended population with a larger number  
305 of possible habitats, it may be possible that re-colonization plays a more significant role in enabling  
306 populations to survive in challenging conditions.

307

308 Finally, we note that in challenging environments, evolutionary rescue can also lead to population  
309 recovery (43). In our system, evolutionary rescue may occur either via enhanced antibiotic  
310 tolerance through the evolution of lag time mutants (44) or via increased drug resistance in one of  
311 the strains. Indeed, we did observe a few cases in which ChIR cells developed a higher resistance  
312 to ampicillin, particularly at high migration rates in the harsh environment (10  $\mu\text{g/ml}$  ampicillin,  
313 16  $\mu\text{g/ml}$  chloramphenicol) (Fig. S8). Interestingly, we found no evidence of such evolution in  
314 extremely harsh environments (10  $\mu\text{g/ml}$  ampicillin, 20  $\mu\text{g/ml}$  chloramphenicol), in which all  
315 populations became extinct within 7 days (Fig. S9). Collectively, these observations suggest that  
316 the optimal conditions for evolution of additional antibiotic resistance represent a tradeoff between  
317 selection pressure, which is primarily determined by the environment, and survival time, which  
318 can be influenced by the migration rate. In addition, the effective population size may also play a  
319 role in guiding the course of evolution in that stronger coupling may lead to a larger population  
320 size and thus more genetic diversity, but may also lead to reduced survival time.

321

322 In the present study, we found that moderate amounts of migration between two coupled bacterial  
323 populations can significantly perturb population oscillations and enhance survival in harsh  
324 environments (Fig. 3D-E). Given that a simple setup can have significant ecological consequences,  
325 it would be interesting to extend this approach to a larger number of connected populations. For  
326 example, in addition to the migration rate, the network topology can play an important role in  
327 governing synchronization (45, 46). The network topology also allows exotic forms of partial  
328 synchronization such as phase clusters and chimeras (47–49), whose relevance to ecological  
329 systems is hitherto unexplored. The effects of asymmetric migration rates, spatial expansion, and  
330 environmental conditions are also worthy of exploration (41, 50–52).

331

332 More generally, our experiments suggest that it is worthwhile to explore how concepts from  
333 macroecology and network theory apply to microbial systems. Despite extensive work in  
334 theoretical ecology and macroecology, relatively little attention has been dedicated to examining  
335 the implications of migration on microbial communities, which can exhibit rich population  
336 dynamics over spatially extended environments. Spatially fragmented yet dispersed microbial  
337 communities can be found in the ocean on organic particulate matter called marine snow (53), in  
338 the ground on soil grains, and on different human body sites, suggesting that the impact of  
339 migration on the ecology of these microbial ecosystems may have implications on topics ranging  
340 from the global carbon cycle (54) to human health. Given that there are notable differences  
341 between microbes and larger organisms (ex. relatively large population sizes with fewer stochastic  
342 fluctuations), further work is necessary to translate findings from theoretical ecology and  
343 macroecology to microbial ecology.

344

## 345 **Materials and Methods:**

346 **Strains:** The strains used are identical to those in (31). Briefly, the chloramphenicol-resistant strain  
347 ChlR is an *E. coli* DH5 $\alpha$  strain transformed with the pBbS5c-RFP plasmid (55) which encodes a  
348 gene for chloramphenicol acetyltransferase (type I) enzyme as well as a gene for monomeric red  
349 fluorescent protein (RFP). The plasmid pbBS5c-RFP was obtained from Jay Keasling (University  
350 of California, Berkeley, CA) via Addgene (plasmid 35284) (55). The ampicillin-resistant strain is  
351 an *E. coli* DH5 $\alpha$  strain transformed with a plasmid encoding a gene for the  $\beta$ -lactamase enzyme  
352 (TEM-1) and a gene for enhanced yellow fluorescent protein (EYFP).

353 **Experiments:** Initial monocultures of our strains were grown for 24 h in culture tubes containing  
354 5 ml LB supplemented with antibiotic for selection (50  $\mu$ g/mL ampicillin and 25  $\mu$ g/mL  
355 chloramphenicol for AmpR and ChlR, respectively) at 37°C and shaken at 250 rpm. The following  
356 day, 200  $\mu$ L of co-cultures of the two strains were grown at varying initial population fractions in  
357 LB without antibiotics. For synchronization experiments, the initial ratios of AmpR cells to ChlR  
358 cells were chosen such that the probability for paired co-cultures to be in the same phase of  
359 oscillation in the absence of migration ( $m = 0$ ) was low. Subsequently, serial migration-dilution  
360 experiments were performed in well-mixed batch culture with a culture volume of 200  $\mu$ L. In each  
361 cycle, co-cultures were grown for 24 hours in LB media supplemented with the antibiotics

362 ampicillin and chloramphenicol. During growth, cultures were shaken at 500 rpm at a temperature  
363 of 37°C. At the end of the growth cycle, we measured the optical density (OD) at 600 nm and  
364 prepared flow cytometry samples by diluting 5µL of each grown co-culture by a factor of 1600  
365 into phosphate buffer (PBS, Corning 21-040-CV). To perform the migration step, we pipetted  
366 fixed volumes of each co-culture within a connected pair into the other at the end of each growth  
367 cycle; subsequently, these co-cultures were diluted by a factor of 100 into fresh LB media and  
368 antibiotics. Growth medium was prepared by using BD's Difco™ LB Broth (Miller) (catalog  
369 no. 244620). Ampicillin stock was prepared by dissolving ampicillin sodium salt (Sigma-Aldrich  
370 catalog no. A9518) in LB at a concentration of 50 mg/mL. The solution was filter sterilized, stored  
371 frozen at -20°C, and thawed before use. Chloramphenicol stock was prepared by dissolving  
372 chloramphenicol powder (Sigma-Aldrich catalog no. C0378) in 200 proof pure ethanol (KOPTEC)  
373 at a concentration of 25 mg/mL. This solution was filter sterilized and stored at -20°C. Prepared  
374 96-well plates of media supplemented with antibiotics were stored at -80°C, thawed 1 d prior to  
375 inoculation at 4°C and warmed for 1 hour at 37°C immediately before inoculation.

376 **Measurement and Data Analysis:** At the end of each growth cycle, we took spectrophotometric  
377 (Thermo Scientific Varioskan Flash at 600 nm) measurements, which serve as a proxy for the total  
378 population size. We converted the OD measurement to CFU/µl based on a calibration curve  
379 obtained from counting colonies on LB and agar plates originating from cultures at various cell  
380 densities. We also took flow cytometry (Miltenyi Biotec MACSQuant VYB) measurements of the  
381 cultures to determine subpopulation sizes. We consider two populations to be synchronized in-  
382 phase if the peaks of their oscillation occur at the same time over the last two oscillation cycles  
383 (the final 40% of the experiment), to reduce the influence of transients as well as gather sufficient  
384 statistics. Data analysis was performed using a combination of Matlab and Origin. Simulations  
385 were performed using Matlab. Flow cytometry data were analyzed using the Python package  
386 FlowCytometryTools (56). Data are available upon request.

387

### 388 **Acknowledgements:**

389 This work was primarily supported by NIH Grant R01 GM102311-01 and National Science  
390 Foundation CAREER Award PHY-1055154. The laboratory acknowledges support from the Pew  
391 Scholars in the Biomedical Sciences Program Grant 2010-000224-007, NIH R00 Pathways to

392 Independence Award GM085279-02, Sloan Foundation Fellowship BR2011-066, the Allen  
393 Distinguished Investigator Program, and NIH New Innovator Award DP2. S.G. was supported by  
394 a Human Frontier Science Program cross-disciplinary postdoctoral fellowship. We also thank  
395 members of the Gore Lab for helpful discussions.

396

### 397 **Contributions:**

398 A.C. and J.G. designed the research; S.G. and T.R. performed the research; S.G. and A.C.  
399 developed models; S.G. and A.C. analyzed data; and S.G., A.C., and J.G. wrote the paper.

400

### 401 **Competing interests:**

402 The authors declare no competing interests.

403

### 404 **References:**

- 405 1. Gilpin M (2012) *Metapopulation dynamics: empirical and theoretical investigations* (Academic  
406 Press).
- 407 2. Hanski I (1998) Metapopulation dynamics. *Nature* 396(6706):41.
- 408 3. Guimera R, Mossa S, Turtschi A, Amaral LN (2005) The worldwide air transportation network:  
409 Anomalous centrality, community structure, and cities' global roles. *Proc Natl Acad Sci* 102(22):7794–  
410 7799.
- 411 4. Cowie RH, Holland BS (2006) Dispersal is fundamental to biogeography and the evolution of  
412 biodiversity on oceanic islands. *J Biogeogr* 33(2):193–198.
- 413 5. Molofsky J, Ferdy J-B (2005) Extinction dynamics in experimental metapopulations. *Proc Natl*  
414 *Acad Sci U S A* 102(10):3726–3731.
- 415 6. Nathan R (2006) Long-distance dispersal of plants. *Science* 313(5788):786–788.
- 416 7. Blasius B, Huppert A, Stone L (1999) Complex dynamics and phase synchronization in spatially  
417 extended ecological systems. *Nature* 399(6734):354.
- 418 8. Limdi A, Perez-Escudero A, Li A, Gore J (2017) Asymmetric migration decreases stability but  
419 increases resilience in a heterogeneous metacommunity. *bioRxiv*. doi:10.1101/201723.

- 420 9. Gilarranz LJ, Rayfield B, Liñán-Cembrano G, Bascompte J, Gonzalez A (2017) Effects of network  
421 modularity on the spread of perturbation impact in experimental metapopulations. *Science*  
422 357(6347):199–201.
- 423 10. Dey S, Joshi A (2006) Stability via asynchrony in *Drosophila* metapopulations with low migration  
424 rates. *Science* 312(5772):434–436.
- 425 11. Abbott KC (2011) A dispersal-induced paradox: synchrony and stability in stochastic  
426 metapopulations. *Ecol Lett* 14(11):1158–1169.
- 427 12. Earn DJ, Levin SA, Rohani P (2000) Coherence and conservation. *Science* 290(5495):1360–1364.
- 428 13. Harrison S (1991) Local extinction in a metapopulation context: an empirical evaluation. *Biol J*  
429 *Linn Soc* 42(1–2):73–88.
- 430 14. Gonzalez A, Lawton JH, Gilbert FS, Blackburn TM, Evans-Freke I (1998) Metapopulation  
431 dynamics, abundance, and distribution in a microecosystem. *Science* 281(5385):2045–2047.
- 432 15. Fox JW, Vasseur D, Cotroneo M, Guan L, Simon F (2017) Population extinctions can increase  
433 metapopulation persistence. *Nat Ecol Evol* 1(9):1271.
- 434 16. Hilty JA, Lidicker Jr WZ, Merenlender A (2012) *Corridor ecology: the science and practice of*  
435 *linking landscapes for biodiversity conservation* (Island Press).
- 436 17. Liebhold A, Koenig WD, Bjørnstad ON (2004) Spatial synchrony in population dynamics. *Annu*  
437 *Rev Ecol Syst* 35:467–490.
- 438 18. Kerr B, Neuhauser C, Bohannan BJ, Dean AM (2006) Local migration promotes competitive  
439 restraint in a host-pathogen 'tragedy of the commons'. *Nature* 442(7098):75.
- 440 19. Grassly NC, Fraser C, Garnett GP (2005) Host immunity and synchronized epidemics of syphilis  
441 across the United States. *Nature* 433(7024):417.
- 442 20. Viboud C, et al. (2006) Synchrony, waves, and spatial hierarchies in the spread of influenza.  
443 *Science* 312(5772):447–451.
- 444 21. Grenfell BT, Bjørnstad ON, Kappey J (2001) Travelling waves and spatial hierarchies in measles  
445 epidemics. *Nature* 414(6865):716–723.
- 446 22. Ray C, Hastings A (1996) Density dependence: are we searching at the wrong spatial scale? *J*  
447 *Anim Ecol*:556–566.
- 448 23. Ben-Zion Y, Fried Y, Shnerb NM (2012) Migration, coherence and persistence in a fragmented  
449 landscape. *Theor Ecol* 5(4):481–493.
- 450 24. Yaari Gur, Ben-Zion Yossi, Shnerb Nadav M., Vasseur David A. (2012) Consistent scaling of  
451 persistence time in metapopulations. *Ecology* 93(5):1214–1227.



- 452 25. Khasin M, Meerson B, Khain E, Sander LM (2012) Minimizing the Population Extinction Risk by  
453 Migration. *Phys Rev Lett* 109(13):138104.
- 454 26. Lampert A, Hastings A (2013) Synchronization-induced persistence versus selection for habitats  
455 in spatially coupled ecosystems. *J R Soc Interface* 10(87). doi:10.1098/rsif.2013.0559.
- 456 27. Ellner SP, et al. (2001) Habitat structure and population persistence in an experimental  
457 community. *Nature* 412:538.
- 458 28. Holyoak Marcel, Lawler Sharon P. (1996) Persistence of an Extinction-Prone Predator-Prey  
459 Interaction Through Metapopulation Dynamics. *Ecology* 77(6):1867–1879.
- 460 29. Zion YB, Yaari G, Shnerb NM (2010) Optimizing metapopulation sustainability through a  
461 checkerboard strategy. *PLoS Comput Biol* 6(1):e1000643.
- 462 30. Lampert Adam, Hastings Alan, Drake John (2016) Stability and distribution of predator–prey  
463 systems: local and regional mechanisms and patterns. *Ecol Lett* 19(3):279–288.
- 464 31. Yurtsev EA, Conwill A, Gore J (2016) Oscillatory dynamics in a bacterial cross-protection  
465 mutualism. *Proc Natl Acad Sci* 113(22):6236–6241.
- 466 32. Hoek TA, et al. (2016) Resource Availability Modulates the Cooperative and Competitive Nature  
467 of a Microbial Cross-Feeding Mutualism. *PLOS Biol* 14(8):e1002540.
- 468 33. Müller MJ, Neugeboren BI, Nelson DR, Murray AW (2014) Genetic drift opposes mutualism  
469 during spatial population expansion. *Proc Natl Acad Sci* 111(3):1037.
- 470 34. Fussmann GF, Ellner SP, Shertzer KW, Hairston Jr. NG (2000) Crossing the Hopf Bifurcation in a  
471 Live Predator-Prey System. *Science* 290(5495):1358.
- 472 35. Becks Lutz, Ellner Stephen P., Jones Laura E., Hairston Jr Nelson G. (2010) Reduction of adaptive  
473 genetic diversity radically alters eco-evolutionary community dynamics. *Ecol Lett* 13(8):989–997.
- 474 36. Zomorodi AR, Segrè D (2016) Synthetic Ecology of Microbes: Mathematical Models and  
475 Applications. *Eng Tools Prospects Synth Biol* 428(5, Part B):837–861.
- 476 37. Friedman J, Gore J (2017) Ecological systems biology: The dynamics of interacting populations.  
477 *Future Syst Biol • Genomics Epigenomics* 1:114–121.
- 478 38. Wysham DB, Hastings A (2008) Sudden shifts in ecological systems: Intermittency and transients  
479 in the coupled Ricker population model. *Bull Math Biol* 70(4):1013–1031.
- 480 39. Nicoloff H, Andersson DI (2015) Indirect resistance to several classes of antibiotics in cocultures  
481 with resistant bacteria expressing antibiotic-modifying or-degrading enzymes. *J Antimicrob Chemother*  
482 71(1):100–110.

- 483 40. Sykes RB, Matthew M (1976) The  $\beta$ -lactamases of gram-negative bacteria and their role in  
484 resistance to  $\beta$ -lactam antibiotics. *J Antimicrob Chemother* 2(2):115–157.
- 485 41. Dey S, Goswami B, Joshi A (2014) Effects of symmetric and asymmetric dispersal on the  
486 dynamics of heterogeneous metapopulations: two-patch systems revisited. *J Theor Biol* 345:52–60.
- 487 42. Dey S, Goswami B, Joshi A (2015) A possible mechanism for the attainment of out-of-phase  
488 periodic dynamics in two chaotic subpopulations coupled at low dispersal rate. *J Theor Biol* 367:100–  
489 110.
- 490 43. Bell G, Gonzalez A (2011) Adaptation and evolutionary rescue in metapopulations experiencing  
491 environmental deterioration. *Science* 332(6035):1327–1330.
- 492 44. Fridman O, Goldberg A, Ronin I, Shores N, Balaban NQ (2014) Optimization of lag time  
493 underlies antibiotic tolerance in evolved bacterial populations. *Nature* 513(7518):418.
- 494 45. Noble AE, Machta J, Hastings A (2015) Emergent long-range synchronization of oscillating  
495 ecological populations without external forcing described by Ising universality. *Nat Commun* 6.
- 496 46. Holland MD, Hastings A (2008) Strong effect of dispersal network structure on ecological  
497 dynamics. *Nature* 456(7223):792.
- 498 47. Abrams DM, Strogatz SH (2004) Chimera states for coupled oscillators. *Phys Rev Lett*  
499 93(17):174102.
- 500 48. Tinsley MR, Nkomo S, Showalter K (2012) Chimera and phase-cluster states in populations of  
501 coupled chemical oscillators. *Nat Phys* 8(9):662.
- 502 49. Martens EA, Thutupalli S, Fourrière A, Hallatschek O (2013) Chimera states in mechanical  
503 oscillator networks. *Proc Natl Acad Sci* 110(26):10563–10567.
- 504 50. Franco D, Ruiz-Herrera A (2015) To connect or not to connect isolated patches. *J Theor Biol*  
505 370:72–80.
- 506 51. Becks L, Arndt H (2013) Different types of synchrony in chaotic and cyclic communities. *Nat*  
507 *Commun* 4:1359.
- 508 52. Sullivan LL, Li B, Miller TE, Neubert MG, Shaw AK (2017) Density dependence in demography and  
509 dispersal generates fluctuating invasion speeds. *Proc Natl Acad Sci* 114(19):5053–5058.
- 510 53. Alldredge AL, Silver MW (1988) Characteristics, dynamics and significance of marine snow. *Prog*  
511 *Oceanogr* 20(1):41–82.
- 512 54. Azam F, Long RA (2001) Sea snow microcosms. *Nature* 414(6863):495–498.
- 513 55. Lee TS, et al. (2011) BglBrick vectors and datasheets: a synthetic biology platform for gene  
514 expression. *J Biol Eng* 5(1):12.

515 56. Yurtsev E, Friedman J, Gore J *FlowCytometryTools: Version 0.4.5*.

516

517

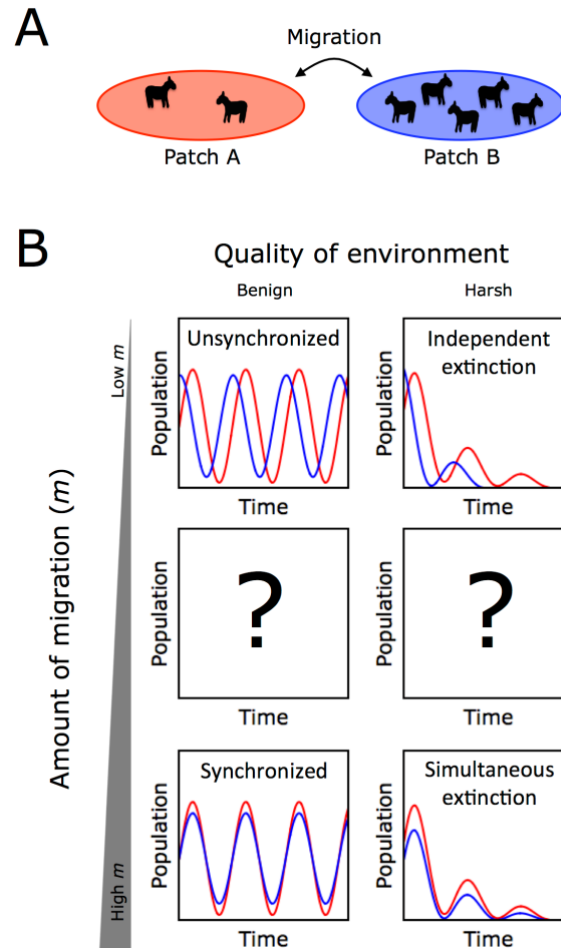

518

519 **Fig 1: The cartoon illustrates possible qualitative effects of migration on population**  
520 **dynamics of a species in benign as well as harsh environmental conditions. A)** The population  
521 dynamics of two patches can be coupled via migration. **B)** Under benign conditions, low migration  
522 rates are insufficient to couple population dynamics on the two patches (top left). On the other  
523 hand, high migration rates lead to in-phase synchronization, rendering the two patches equivalent  
524 (bottom left). An open question concerns how the population dynamics respond to intermediate  
525 migration rates (center left). In harsh conditions, population patches can become extinct (top right)  
526 and high migrations rate could lead to simultaneous extinction (bottom right). At intermediate  
527 migration rates, we investigate whether altered population dynamics could potentially lead to  
528 longer survival times (center right).

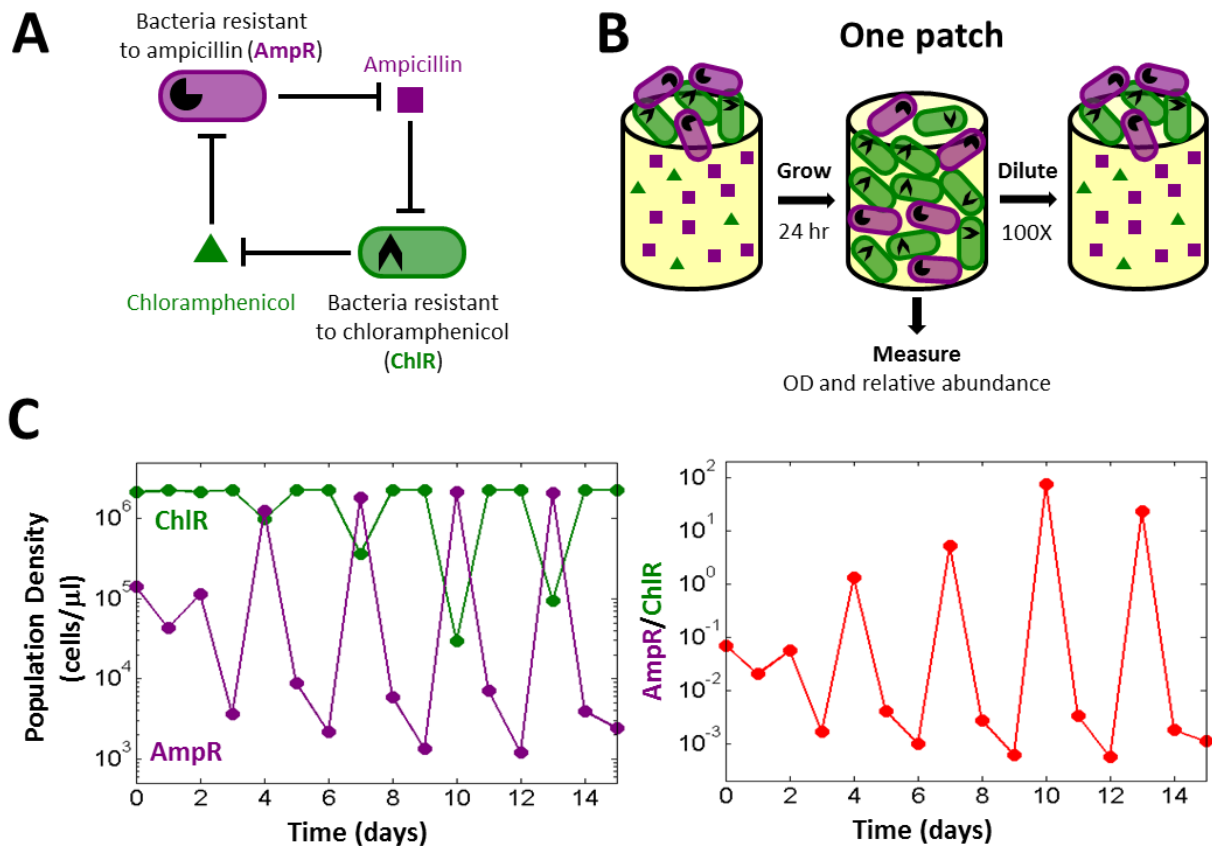

529

530 **Fig 2: A bacterial cross-protection mutualism serves as a model system to study migration-**  
 531 **induced synchronization of population oscillations.** A) Diagram depicting the mutualistic  
 532 interaction between ampicillin resistant (AmpR) and chloramphenicol resistant (ChlR) cells.  
 533 AmpR cells protect ChlR cells by enzymatically deactivating ampicillin, whereas ChlR cells  
 534 protect AmpR cells by deactivating chloramphenicol. B) Schematic illustration of the experimental  
 535 growth-dilution scheme for growing isolated co-cultures in the absence of migration. Each day,  
 536 cells are grown for 24 hours and then diluted by a factor of 100 into fresh media and antibiotics.  
 537 The total cell density as well as relative proportions of AmpR and ChlR cells are measured after  
 538 24 hours of growth, before the dilution step. C) Isolated co-cultures exhibit period 3 oscillations  
 539 in the density of AmpR and ChlR cells (left panel) as well as in the ratio of AmpR cells to ChlR  
 540 cells (right panel) under benign conditions. This experimental condition corresponds to 10  $\mu\text{g/ml}$   
 541 of ampicillin and 8  $\mu\text{g/ml}$  of chloramphenicol.

542

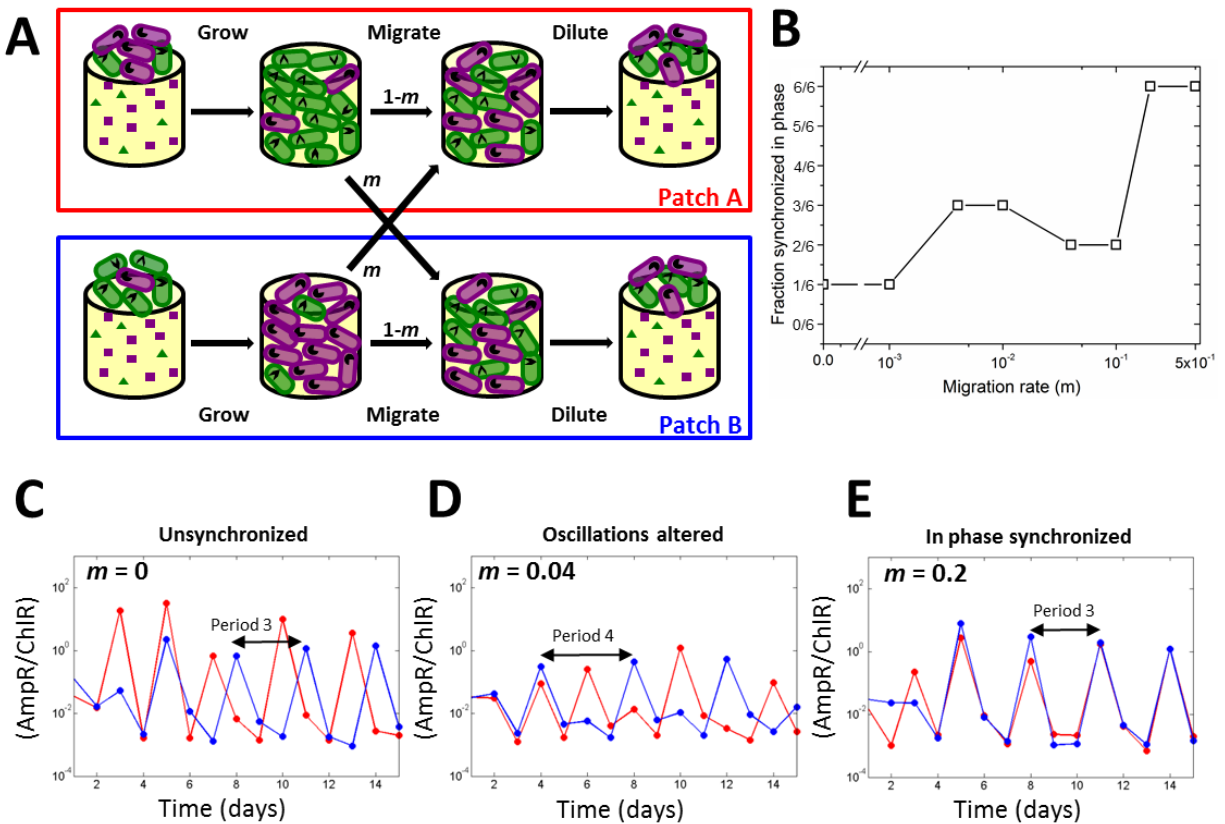

543

544 **Fig 3: Increased migration rate leads to altered population dynamics and ultimately to**  
 545 **synchronization.** **A)** Schematic illustration of the growth-migration-dilution scheme employed in  
 546 the experiments with two connected bacterial populations. The two patches A (red box) and B  
 547 (blue box) correspond to two distinct co-cultures of AmpR and ChIR cells. The migration rate is  
 548 denoted by  $m$ . **B)** The fraction (out of six replicates) of connected pairs of co-cultures synchronized  
 549 in phase as a function of the migration rate in benign environmental conditions. **C-E)**  
 550 Representative time series for the ratio of AmpR cells to ChIR cells in patches A (red plot) and B  
 551 (blue plot) for  $m = 0$  (**C**),  $m = 0.04$  (**D**), and  $m = 0.2$  (**E**), showing unsynchronized period 3  
 552 oscillations, disturbed oscillations with various periods and in-phase synchronized period 3  
 553 oscillations respectively. In **B-E**, the experimental condition corresponds to 10  $\mu\text{g/ml}$  of ampicillin  
 554 and 8  $\mu\text{g/ml}$  of chloramphenicol.

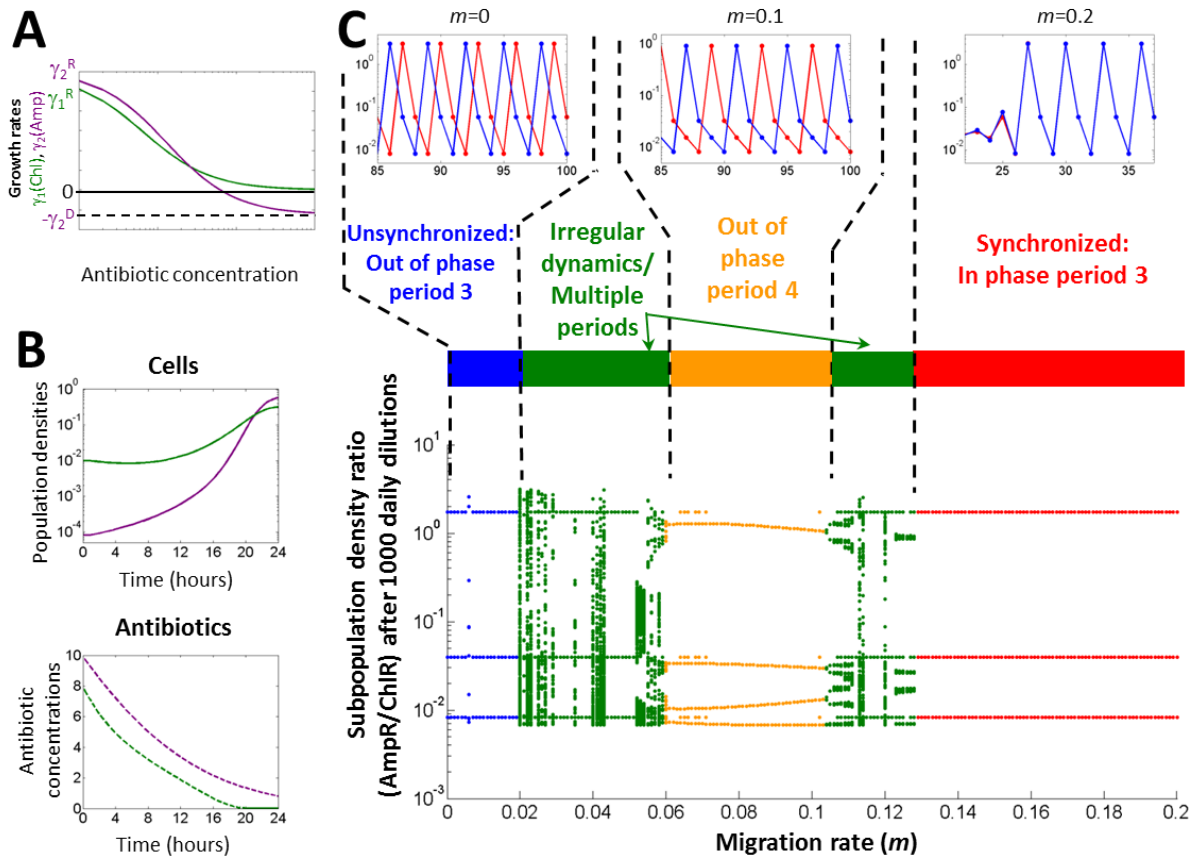

555

556 **Fig 4: A mechanistic model of antibiotic degradation captures the experimentally observed**  
 557 **sequence of dynamical outcomes.** A) Dependence of growth rates on the concentration of  
 558 antibiotics. B) Simulated ampicillin resistant (AmpR) and chloramphenicol resistant (ChIR)  
 559 cell densities (top panel) and antibiotic concentrations (bottom panel) over the course of one 24 hour  
 560 growth cycle, shown in purple and green respectively. C) Bifurcation diagram for a simulation of  
 561 two co-cultures in a benign environmental condition (10  $\mu\text{g/ml}$  of ampicillin, 8  $\mu\text{g/ml}$  of  
 562 chloramphenicol) as a function of the migration rate  $m$ . Unique values of the subpopulation density  
 563 ratio (AmpR/ChIR) attained by patch A at the end of the growth cycle over the last 50 days of a  
 564 simulation with 1000 daily dilutions are plotted for each migration rate. The simulations are  
 565 deterministic. The diagram captures the sequence of observed dynamical outcomes:  
 566 unsynchronized period 3 oscillations in the absence of migration, period-4 oscillations and  
 567 irregular dynamics at intermediate migration rates, and in-phase synchronized period 3 oscillations  
 568 at large migration rates. The insets in (C) show representative time series for  $m = 0$ ,  $m = 0.1$  and  
 569  $m = 0.2$ . Model parameters can be found in Table S1.



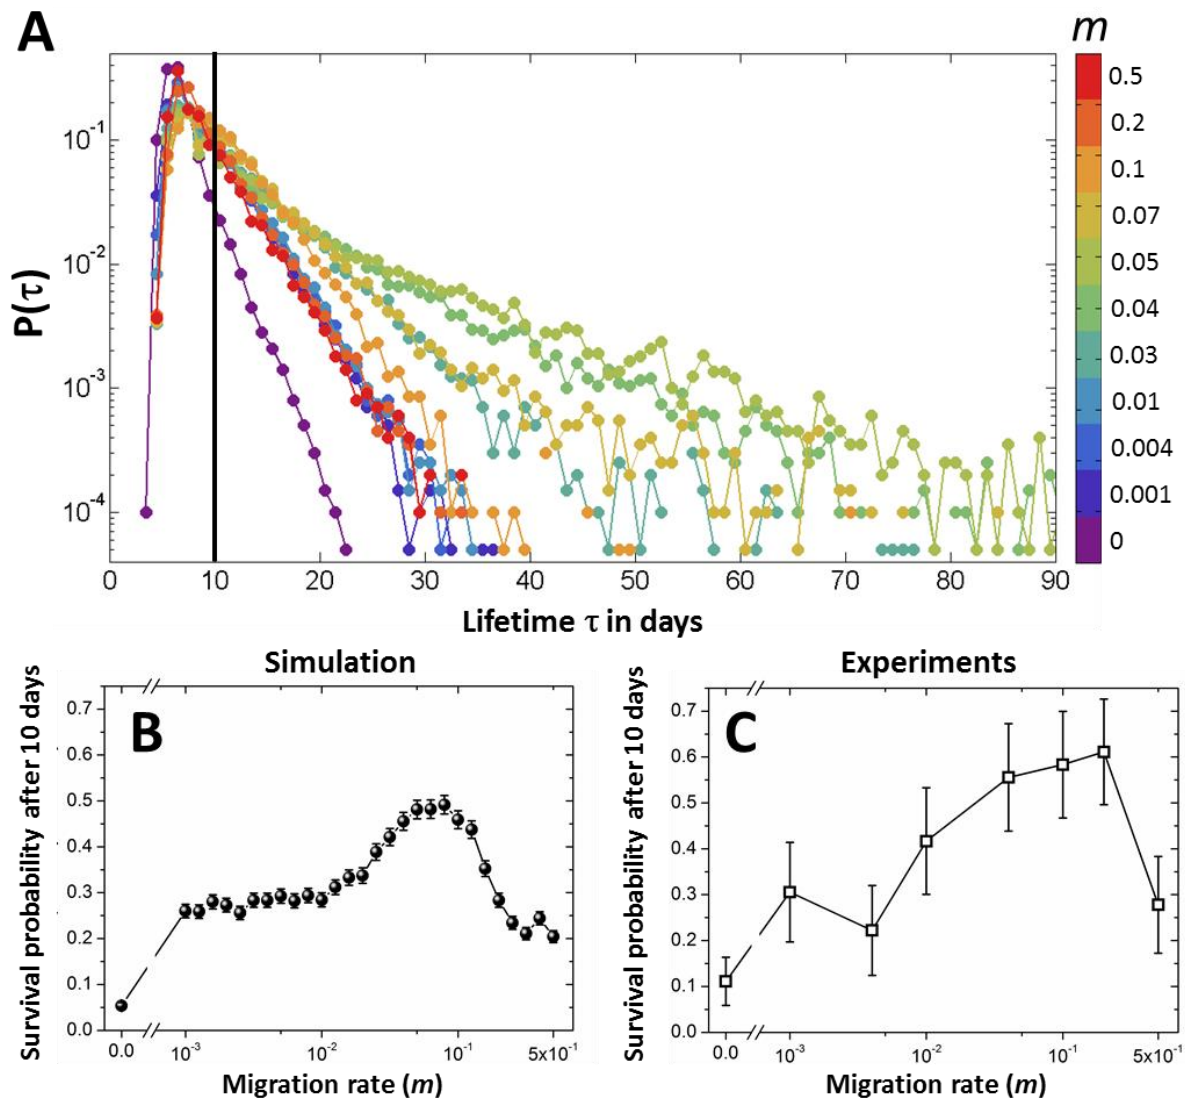

570

571 **Fig 5: Moderate levels of migration help populations survive longer in harsh environments.**

572 **A)** Simulated probability distributions of survival times of populations in a harsh environment (10  
 573  $\mu\text{g/ml}$  of ampicillin, 16  $\mu\text{g/ml}$  of chloramphenicol) for various migration rates. The distributions  
 574 were generated from 6000 simulation runs with initial conditions distributed around the three  
 575 phases of the period-3 oscillations observed in Fig. 4C. Connected patches were initialized in  
 576 different phases to avoid minimize synchronization.  $P(\tau)$  is defined as the fraction of initial  
 577 conditions that survived for  $\tau$  days. Different colors represent different migration rates, as  
 578 indicated in the colorbar. The survival time distributions have longer tails at intermediate migration  
 579 rates. The black vertical line indicates the threshold (10 days) used for calculating the survival

580 probability. This threshold was chosen to match the duration of the experiments. **B)** Simulated  
581 probability of survival after 10 days in the harsh environment as a function of the migration rate.  
582 **C)** Experimentally measured survival probability after 10 days as a function of the migration rate.  
583 Both (B) and (C) exhibit a maximum at intermediate migration rates, demonstrating that moderate  
584 amounts of migration help populations to survive longer in harsh environments. The error bars in  
585 (B) and (C) are standard errors of proportion.
